# Supplementary material for: Assembly of Co(ii)/Cu(ii)–azido polynuclear polymers: structural diversity and magnetic behavior
Source: Royal Society of Chemistry journal article supplement (doi:10.1039/c3ce42130a), 2013-12-04
Supplement: c3ce42130a.pdf [file c3ce42130a.pdf]

## Electronic Supplementary Information

### Assembly of Co(II)/Cu(II)-Azide Polynuclear Polymers: Structural Diversity and Magnetic Behavior

Shuai-Hua Wang<sup>ab</sup>, Fa-Kun Zheng<sup>\*a</sup>, Mei-Feng Wu<sup>c</sup>, Zhi-Fa Liu<sup>ab</sup>, Jun Chen<sup>ab</sup>, Yu Xiao<sup>ab</sup>, Guo-Cong Guo<sup>a</sup> and A-Qing Wu<sup>a</sup>

<sup>a</sup> State Key Laboratory of Structural Chemistry, Fujian Institute of Research on the Structure of Matter, Chinese Academy of Sciences, Fuzhou, Fujian 350002, P. R. China

<sup>b</sup> University of Chinese Academy of Sciences, Beijing 100039, P. R. China

<sup>c</sup> School of Environmental and Chemical Engineering, Nanchang Hangkong University, Nanchang, Jiangxi 330063, P. R. China

**Table S1** The selected bond distances and angles for **1–3**.

| <b>Polymer 1</b>  |          |                     |            |
|-------------------|----------|---------------------|------------|
| Co(1)-O(4)        | 1.948(2) | Co(2)-O(3)          | 2.024(2)   |
| Co(1)-O(6)#1      | 1.959(2) | Co(2)-N(3)          | 2.150(3)   |
| Co(1)-N(7)        | 2.017(3) | Co(2)-O(1)          | 2.163(2)   |
| Co(1)-N(4)        | 2.122(3) | Co(2)-N(4)          | 2.185(3)   |
| Co(1)-N(7)#2      | 2.207(3) | Co(2)-O(2)          | 2.219(2)   |
| Co(2)-O(5)#1      | 2.007(2) | N(7)-Co(1)-N(4)     | 98.01(12)  |
| O(4)-Co(1)-O(6)#1 | 121.1(1) | O(4)-Co(1)-N(7)#2   | 86.59(11)  |
| O(4)-Co(1)-N(7)   | 115.1(1) | O(6)#1-Co(1)-N(7)#2 | 88.97(11)  |
| O(6)#1-Co(1)-N(7) | 121.7(1) | N(7)-Co(1)-N(7)#2   | 79.78(12)  |
| O(4)-Co(1)-N(4)   | 95.8(1)  | N(4)-Co(1)-N(7)#2   | 177.31(11) |
| O(6)#1-Co(1)-N(4) | 90.9(1)  | O(5)#1-Co(2)-O(3)   | 111.20(10) |

Symmetry transformations used to generate equivalent atoms:  
#1  $x + 1/2, y - 1/2, z$ ; #2  $-x + 3/2, -y + 3/2, -z$ .

\* Corresponding author. Tel: +86 591 83704827; fax: +86 591 83714946.

E-mail address: [zfk@fjirsm.ac.cn](mailto:zfk@fjirsm.ac.cn) (F.-K. Zheng)

---

**Polymer 2**

---

|                   |          |                     |          |
|-------------------|----------|---------------------|----------|
| Co(1)-O(5)#1      | 1.955(3) | Co(2)-O(6)#1        | 2.023(3) |
| Co(1)-O(3)        | 1.957(3) | Co(2)-N(3)          | 2.132(3) |
| Co(1)-N(7)        | 2.016(3) | Co(2)-N(4)          | 2.169(3) |
| Co(1)-N(4)        | 2.123(3) | Co(2)-O(1)          | 2.167(2) |
| Co(1)-N(7)#2      | 2.196(3) | Co(2)-O(2)          | 2.208(3) |
| Co(2)-O(4)        | 2.014(2) | N(7)-Co(1)-N(4)     | 97.2(1)  |
| O(5)#1-Co(1)-O(3) | 121.4(1) | O(5)#1-Co(1)-N(7)#2 | 86.8(1)  |
| O(5)#1-Co(1)-N(7) | 113.2(1) | O(3)-Co(1)-N(7)#2   | 89.4(1)  |
| O(3)-Co(1)-N(7)   | 123.6(1) | N(7)-Co(1)-N(7)#2   | 80.3(1)  |
| O(5)#1-Co(1)-N(4) | 96.0(1)  | N(4)-Co(1)-N(7)#2   | 176.8(1) |
| O(3)-Co(1)-N(4)   | 90.5(2)  | O(4)-Co(2)-O(6)#1   | 110.9(1) |

Symmetry transformations used to generate equivalent atoms:

#1  $x - 1/2, y + 1/2, z$ ; #2  $-x + 1/2, -y + 1/2, -z$ .

---

**Polymer 3**

---

|                   |            |                      |            |
|-------------------|------------|----------------------|------------|
| Cu(1)-N(7)        | 1.982(4)   | Cu(3)-N(18)#1        | 1.975(4)   |
| Cu(1)-N(13)       | 2.011(3)   | Cu(3)-N(19)          | 2.023(3)   |
| Cu(1)-N(19)       | 2.015(3)   | Cu(3)-N(4)#2         | 2.049(3)   |
| Cu(1)-N(22)       | 2.025(3)   | Cu(3)-N(22)          | 2.071(3)   |
| Cu(1)-N(16)       | 2.347(4)   | Cu(3)-N(13)#2        | 2.344(4)   |
| Cu(2)-N(10)       | 1.973(4)   | Cu(1)-N(19)#1        | 2.688(4)   |
| Cu(2)-N(7)        | 2.026(3)   | Cu(2)-N(4)           | 2.067(4)   |
| Cu(2)-N(3)        | 2.060(4)   | N(22)-Cu(3)-N(13)#2  | 94.48(13)  |
| N(7)-Cu(1)-N(13)  | 86.68(14)  | N(10)-Cu(2)-N(4)     | 88.85(15)  |
| N(7)-Cu(1)-N(19)  | 169.66(15) | N(7)-Cu(2)-N(4)      | 89.00(14)  |
| N(13)-Cu(1)-N(19) | 95.14(14)  | N(3)-Cu(2)-N(4)      | 168.64(14) |
| N(7)-Cu(1)-N(22)  | 95.45(14)  | N(18)#1-Cu(3)-N(19)  | 172.26(14) |
| N(13)-Cu(1)-N(22) | 170.43(15) | N(18)#1-Cu(3)-N(4)#2 | 95.52(14)  |
| N(19)-Cu(1)-N(22) | 81.14(13)  | N(19)-Cu(3)-N(4)#2   | 90.82(13)  |

|                   |            |                       |            |
|-------------------|------------|-----------------------|------------|
| N(7)-Cu(1)-N(16)  | 95.31(14)  | N(18)#1-Cu(3)-N(22)   | 93.94(14)  |
| N(13)-Cu(1)-N(16) | 93.49(14)  | N(19)-Cu(3)-N(22)     | 79.85(13)  |
| N(19)-Cu(1)-N(16) | 94.74(14)  | N(4)#2-Cu(3)-N(22)    | 170.47(13) |
| N(22)-Cu(1)-N(16) | 95.59(14)  | N(18)#1-Cu(3)-N(13)#2 | 95.34(14)  |
| N(10)-Cu(2)-N(7)  | 177.08(14) | N(19)-Cu(3)-N(13)#2   | 89.78(13)  |
| N(10)-Cu(2)-N(3)  | 92.94(14)  | N(4)#2-Cu(3)-N(13)#2  | 83.45(14)  |
| N(7)-Cu(2)-N(3)   | 88.78(14)  |                       |            |

Symmetry transformations used to generate equivalent atoms:

#1  $-x, -y + 1, -z$ ; #2  $-x + 1, -y + 1, -z$ .

---

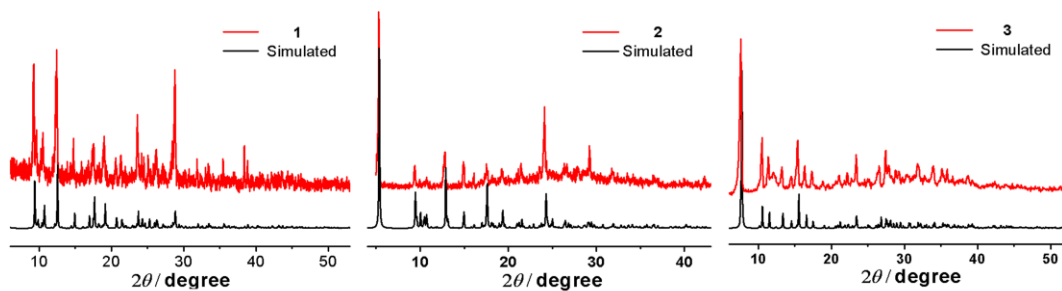

**Fig. S1** PXR D patterns of 1–3.

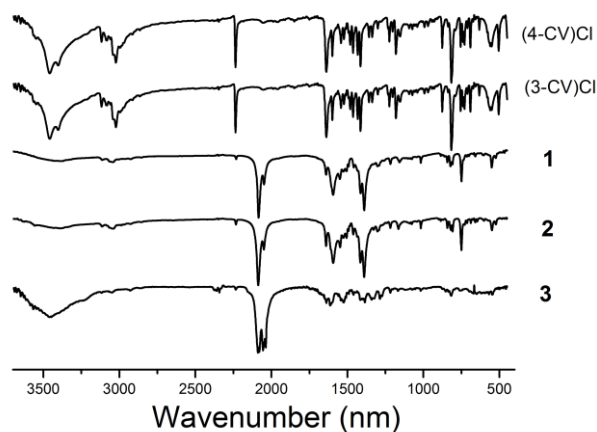

**Fig. S2** IR of (4-CV)Cl, (3-CV)Cl and 1–3.

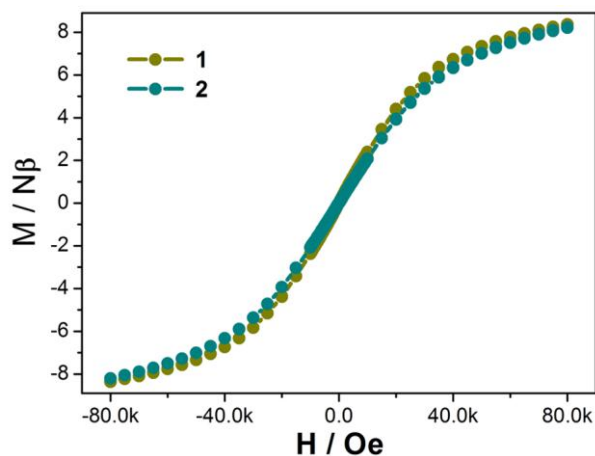

**Fig. S3** Field dependence of magnetization up to  $H = 80\text{ kOe}$  at  $T = 2\text{K}$  for **1** and **2**.

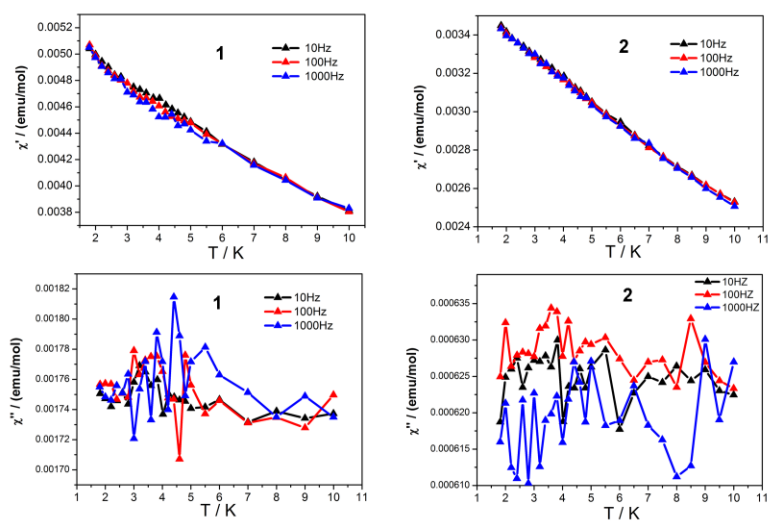

**Fig. S4** Temperature dependence of in-phase ( $\chi'$ ) and out-of-phase ( $\chi''$ ) *ac* magnetic susceptibility for **1** and **2** at zero external magnetic field under three different frequencies of 10 Hz, 100 Hz and 1000 Hz.

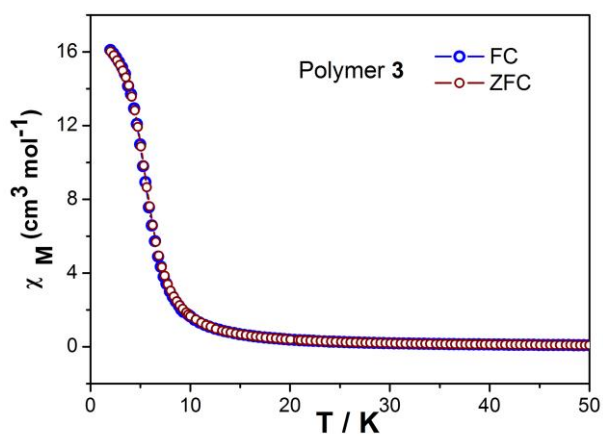

**Fig. S5** Zero-field-cooling (ZFC) and field-cooling (FC) magnetization versus  $T$  measured under 1000 Oe for **3**.

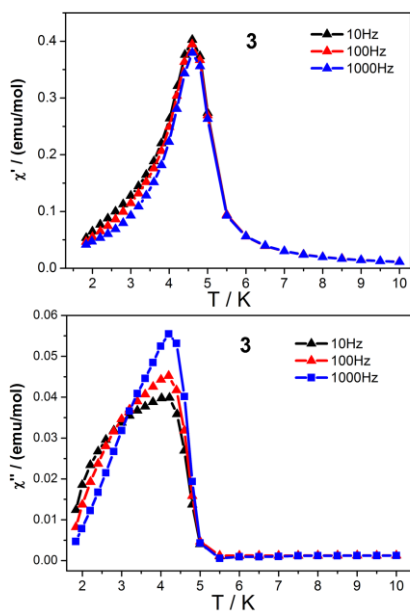

**Fig. S6** Temperature dependence of in-phase ( $\chi'$ ) and out-of-phase ( $\chi''$ ) *ac* magnetic susceptibility for **3** at zero external magnetic field with three different frequencies of 10 Hz, 100 Hz and 1000 Hz.
